# Supplementary material for: Non-invasive stratification of hepatocellular carcinoma risk in non-alcoholic fatty liver using polygenic risk scores
Source: PubMed Central journal article supplement — J Hepatol. 2021 Apr;74(4):775–82. doi: 10.1016/j.jhep.2020.11.024 (PMC7987554; doi:10.1016/j.jhep.2020.11.024), 2021-04
Supplement: mmc2.pdf [file mmc2.pdf]

## Journal of Hepatology

### CTAT methods

Tables for a “Complete, Transparent, Accurate and Timely account” (CTAT) are now mandatory for all revised submissions. The aim is to enhance the reproducibility of methods.

- Only include the parts relevant to your study
- Refer to the CTAT in the main text as ‘Supplementary CTAT Table’
- Do not add subheadings
- Add as many rows as needed to include all information
- Only include one item per row

If the CTAT form is not relevant to your study, please outline the reasons why:

|  |
|--|
|  |
|--|

#### 1.1 Antibodies

| Name | Citation | Supplier | Cat no. | Clone no. |
|------|----------|----------|---------|-----------|
|      |          |          |         |           |

#### 1.2 Cell lines

| Name | Citation | Supplier | Cat no. | Passage no. | Authentication test method |
|------|----------|----------|---------|-------------|----------------------------|
|      |          |          |         |             |                            |

#### 1.3 Organisms

| Name | Citation | Supplier | Strain | Sex | Age | Overall n number |
|------|----------|----------|--------|-----|-----|------------------|
|      |          |          |        |     |     |                  |

#### 1.4 Sequence based reagents

| Name                                                   | Sequence                                                                      | Supplier                 |
|--------------------------------------------------------|-------------------------------------------------------------------------------|--------------------------|
| TaqMan SNP assay for rs738409                          | <a href="#">C_____7241_10</a>                                                 | Thermo Fisher Scientific |
| TaqMan SNP assay for rs58542926                        | <a href="#">C_89463510_10</a>                                                 | Thermo Fisher Scientific |
| TaqMan SNP assay for rs641738                          | <a href="#">C_8716820_10</a>                                                  | Thermo Fisher Scientific |
| TaqMan SNP assay for rs1260326                         | <a href="#">C___2862880_1_</a>                                                | Thermo Fisher Scientific |
| <a href="#">Custom TaqMan SNP assay for rs72613567</a> | See <a href="https://doi.org/10.1002/hep.30799">doi.org/10.1002/hep.30799</a> | Thermo Fisher Scientific |

#### 1.5 Biological samples

| Description            | Source                      | Identifier         |
|------------------------|-----------------------------|--------------------|
| DNA from PBMC of 2,564 | Multicentric study, leading | NAFLD/MAFLD cohort |

|                                                                                                                                            |                                                                                                                                                                           |                           |
|--------------------------------------------------------------------------------------------------------------------------------------------|---------------------------------------------------------------------------------------------------------------------------------------------------------------------------|---------------------------|
| patients with NAFLD/MAFLD and healthy controls (see Methods – patients section, and Supplementary Methods – study cohort characterization) | center: Fondazione IRCCS Ca' Granda Ospedale Maggiore Policlinico Milano (see Methods – patients section, and Supplementary Methods – study cohort characterization)      |                           |
| DNA from PBMC of 427 patients with NAFLD/MAFLD (see Methods – patients section, and Supplementary Methods – study cohort characterization) | Patients referred to the University Clinic of Leipzig and Universital Dresden (see Methods – patients section, and Supplementary Methods – study cohort characterization) | German NAFLD/MAFLD cohort |

## 1.6 Deposited data

| Name of repository  | Identifier          | Link                                                                                    |
|---------------------|---------------------|-----------------------------------------------------------------------------------------|
| UK BioBank          | UKBB                | <a href="https://www.ukbiobank.ac.uk/">https://www.ukbiobank.ac.uk/</a>                 |
| 1000 Genome Project | 1000 Genome Project | <a href="https://www.internationalgenome.org/">https://www.internationalgenome.org/</a> |

## 1.7 Software

| Software name                         | Manufacturer            | Version |
|---------------------------------------|-------------------------|---------|
| JMP Pro Statistical Analysis Software | SAS Institute, Cary, NC | 14.0    |
| R                                     | CRAN                    | 3.5.2   |

## 1.8 Other (e.g. drugs, proteins, vectors etc.)

|  |  |  |
|--|--|--|
|  |  |  |
|  |  |  |

## 1.9 Please provide the details of the corresponding methods author for the manuscript:

|                                                                                                                                                                                                                                                                                                                                                                                                                                                                 |
|-----------------------------------------------------------------------------------------------------------------------------------------------------------------------------------------------------------------------------------------------------------------------------------------------------------------------------------------------------------------------------------------------------------------------------------------------------------------|
| <p><b>Luca Valenti, MD</b><br/>           Department of Pathophysiology and Transplantation, Università degli Studi di Milano, Fondazione IRCCS Ca' Granda Ospedale Maggiore Policlinico, Translational Medicine - Department of Transfusion Medicine and Hematology, Fondazione IRCCS Ca' Granda Ospedale Maggiore Policlinico, via F Sforza 35, 20122, Milan, Italy.<br/>           Tel: +390250320278; Fax: +390250320296; E-mail: luca.valenti@unimi.it</p> |
|-----------------------------------------------------------------------------------------------------------------------------------------------------------------------------------------------------------------------------------------------------------------------------------------------------------------------------------------------------------------------------------------------------------------------------------------------------------------|

## 2.0 Please confirm for randomised controlled trials all versions of the clinical protocol are included in the submission. These will be published online as supplementary information.

|  |
|--|
|  |
|--|

# JOURNAL OF HEPATOLOGY
